# Supplementary material for: Enhancement of ionic conductivity in Li argyrodite solid electrolytes with bromide and borohydride anions for all-solid-state batteries
Source: Royal Society of Chemistry journal article supplement (doi:10.1039/d4ta04426f), 2024-01-01
Supplement: d4ta04426f1.pdf [file d4ta04426f1.pdf]

## **Electronic Supplementary Information**

### **Enhancement of ionic conductivity in Li argyrodite solid electrolytes with bromide and borohydride anions for all-solid- state batteries**

Hyungeun Seo,<sup>a</sup> Yong-Jin Jang,<sup>a</sup> Jaeseong Yoo,<sup>a</sup> Ji-Hoon Han,<sup>bc</sup> Young-Su Lee,<sup>b</sup>  
Jae Yup Jung,<sup>d</sup> Soeun Lee,<sup>d</sup> Kyung-Woo Yi,<sup>c</sup> Young Whan Cho,<sup>b</sup> Woosuk Cho\*<sup>d</sup> and  
Jae-Hun Kim\*<sup>a</sup>

<sup>a</sup>School of Materials Science and Engineering, Kookmin University, Seoul 02707, Republic of Korea. E-mail: jaehunkim@kookmin.ac.kr (J.-H. Kim)

<sup>b</sup>Energy Materials Research Center, Korea Institute of Science and Technology, Seoul 02792, Republic of Korea

<sup>c</sup>Department of Materials Science and Engineering, Seoul National University, Seoul 08826, Republic of Korea

<sup>d</sup>Advanced Batteries Research Center, Korea Electronics Technology Institute, Seongnam, Gyeonggi 13509, Republic of Korea. E-mail: cho4153@keti.re.kr (W. Cho)

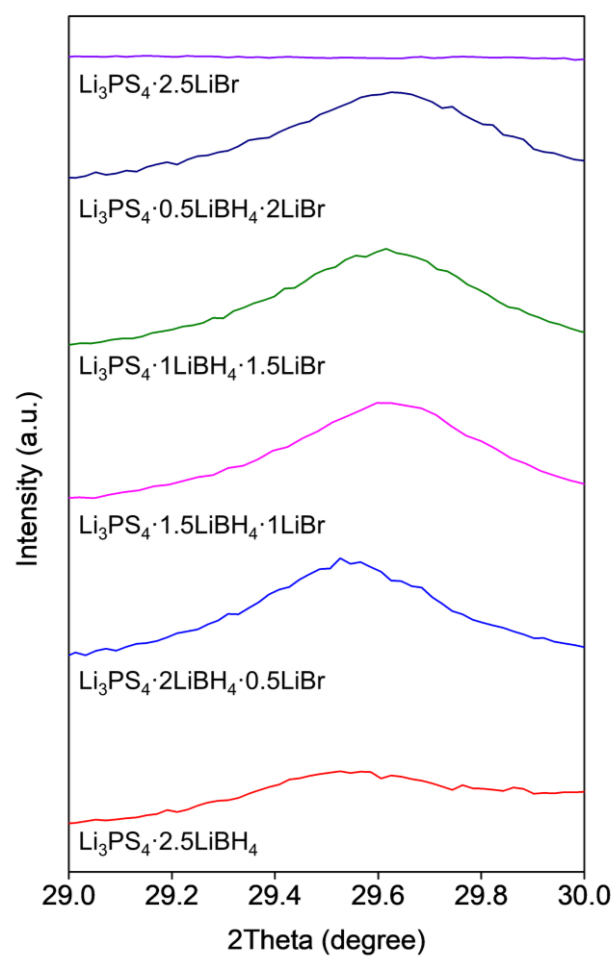

Fig. S1. Enlarged XRD patterns of the prepared solid electrolytes with the composition of  $\text{Li}_3\text{PS}_4 \cdot (2.5-x)\text{LiBH}_4 \cdot x\text{LiBr}$ .

Table S1. Isotropic temperature factor ( $B_{\text{eq}}$ ) and isotropic displacement parameter ( $U_{\text{iso}}$ ) for the Rietveld refinement of the prepared solid electrolyte sample ( $\text{Li}_3\text{PS}_4 \cdot 2\text{LiBH}_4 \cdot 0.5\text{LiBr}$ ).

$$(B_{\text{eq}} = 8\pi^2 U_{\text{iso}})$$

| Atom    | Site    | $B_{\text{eq}}$ | $U_{\text{iso}}$ |
|---------|---------|-----------------|------------------|
| Li      | 48h(T5) | 5.8             | 0.073458         |
| P       | 4b      | 2.06            | 0.02609          |
| S       | 16e     | 2.64            | 0.033436         |
| S       | 4d      | 2.31            | 0.029256         |
| B       | 4d      | 2.31            | 0.029256         |
| Br      | 4d      | 2.31            | 0.029256         |
| S       | 4a      | 3.02            | 0.038249         |
| B       | 4a      | 3.02            | 0.038249         |
| Br      | 4a      | 3.02            | 0.038249         |
| H(B@4d) | 16e     | 2.31            | 0.029256         |
| H(B@4d) | 16e     | 2.31            | 0.029256         |
| H(B@4a) | 16e     | 3.02            | 0.038249         |
| H(B@4a) | 16e     | 3.02            | 0.038249         |

Rietveld refinement was performed using TOPAS v.5 software (Bruker AXS) over the  $2\theta$  range of  $10^\circ$ – $70^\circ$ . Because the limited quality of the XRD data did not allow us to refine the position of H in  $\text{BH}_4^-$ , the B–H bond length was fixed to 1.1 Å, the usual bond length of B–H obtained from XRD. Within the symmetry of F-43m, there are two possible orientations of  $\text{BH}_4^-$ , and we assumed an equal occupancy for the two orientations.

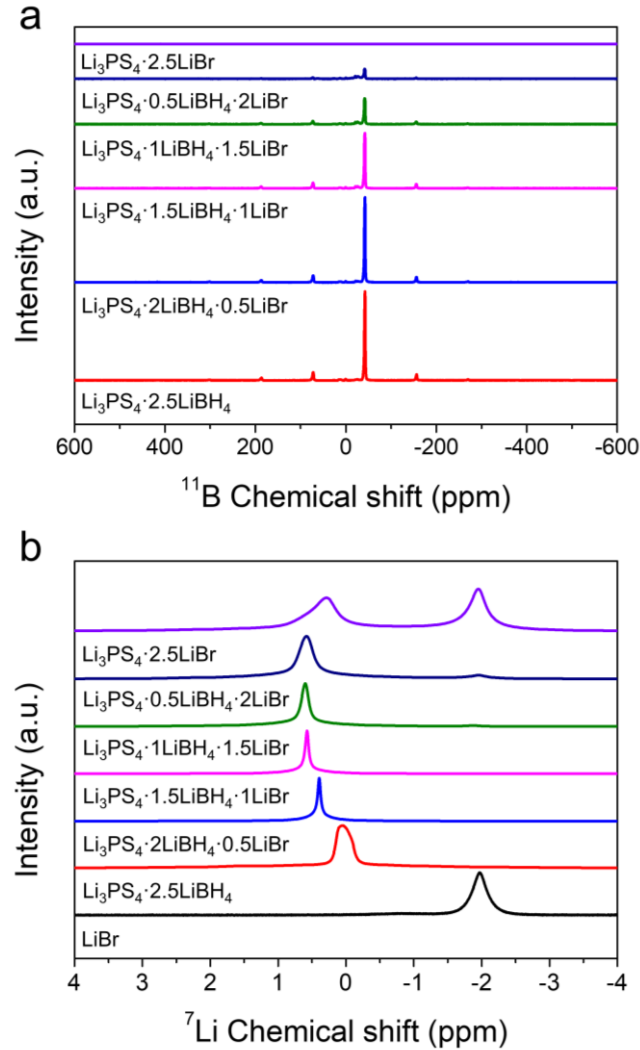

Fig. S2. (a)  $^{11}\text{B}$  and (b)  $^7\text{Li}$  solid-state MAS NMR spectra of the prepared solid electrolyte samples with the composition of  $\text{Li}_3\text{PS}_4 \cdot (2.5-x)\text{LiBH}_4 \cdot x\text{LiBr}$ .

For the  $^7\text{Li}$  solid-state MAS NMR spectra of the  $x = 0.5$  sample ( $\text{Li}_3\text{PS}_4 \cdot 2\text{LiBH}_4 \cdot 0.5\text{LiBr}$ ), the main peak is observed at 0.4 ppm, which is in good agreement with the previous report. When the  $x$  value increases, the main peak position of the solid electrolyte samples shifts toward a higher frequency. This trend is observed as the amount of  $\text{LiBH}_4$  in the argyrodite samples decreases. In the  $x = 2.5$  sample ( $\text{Li}_3\text{PS}_4 \cdot 2.5\text{LiBr}$ ), a peak at approximately  $-2.0$  ppm is observed, attributed to the unreacted  $\text{LiBr}$ . This result is consistent with the XRD results. Moreover, when  $\text{LiBr}$  is added, as indicated by the XRD results, it increases the degree of crystallinity, which can sharpen the peaks in the  $^7\text{Li}$  solid-state MAS NMR spectra. However, when more than 1 equivalent of  $\text{LiBr}$  is added, unreacted  $\text{LiBr}$  appears, causing an uneven local magnetic field around the  $\text{Li}$  ions, which can broaden the NMR peaks.

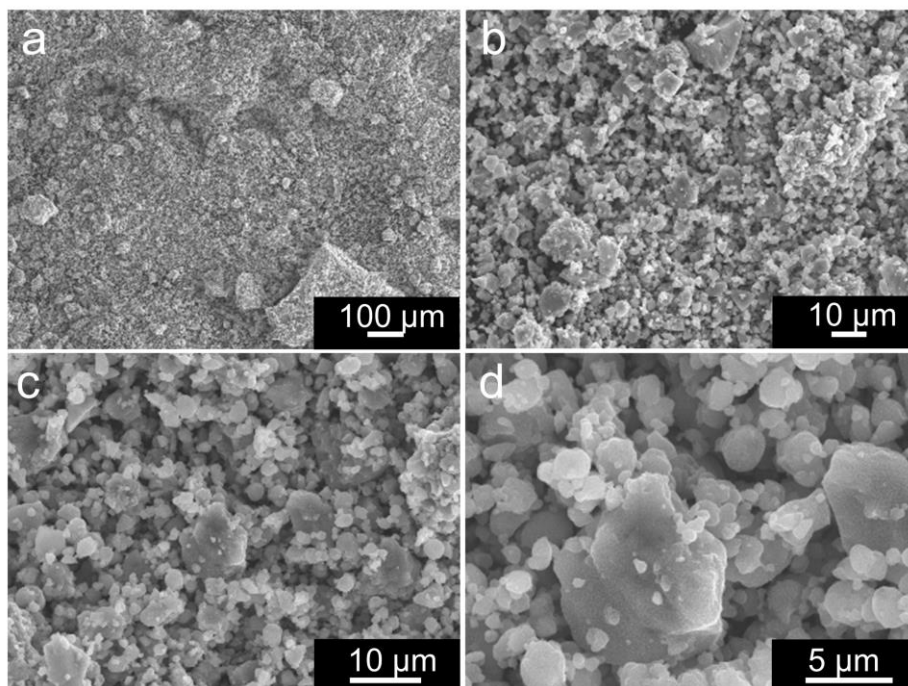

Fig. S3. FE-SEM images of the prepared solid electrolyte sample ( $\text{Li}_3\text{PS}_4 \cdot 2\text{LiBH}_4 \cdot 0.5\text{LiBr}$ ) at different magnifications.

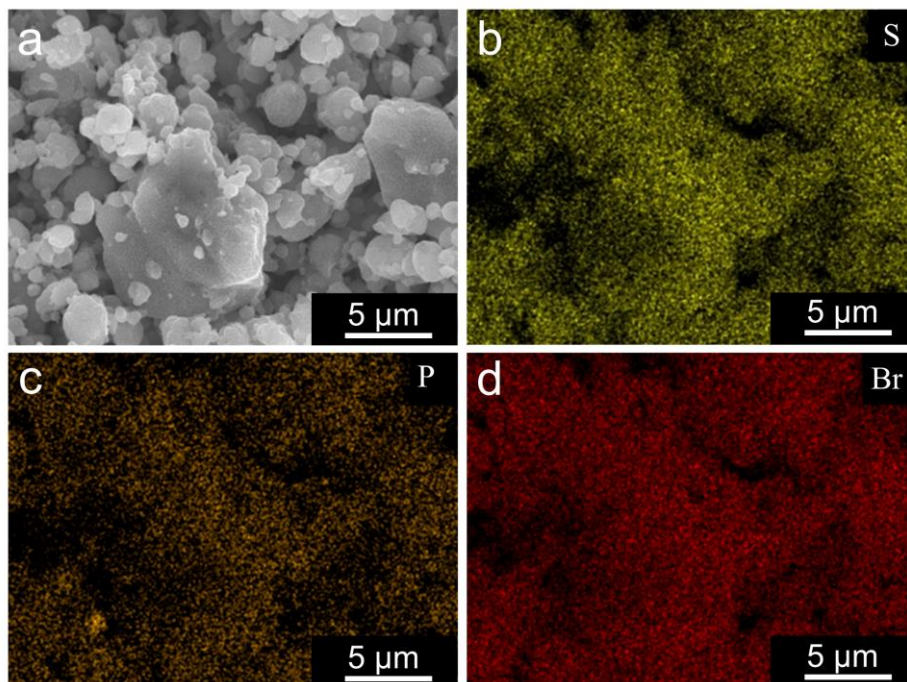

Fig. S4. (a) FE-SEM and (b–d) EDS elemental mapping images of the prepared solid electrolyte sample ( $\text{Li}_3\text{PS}_4 \cdot 2\text{LiBH}_4 \cdot 0.5\text{LiBr}$ ).

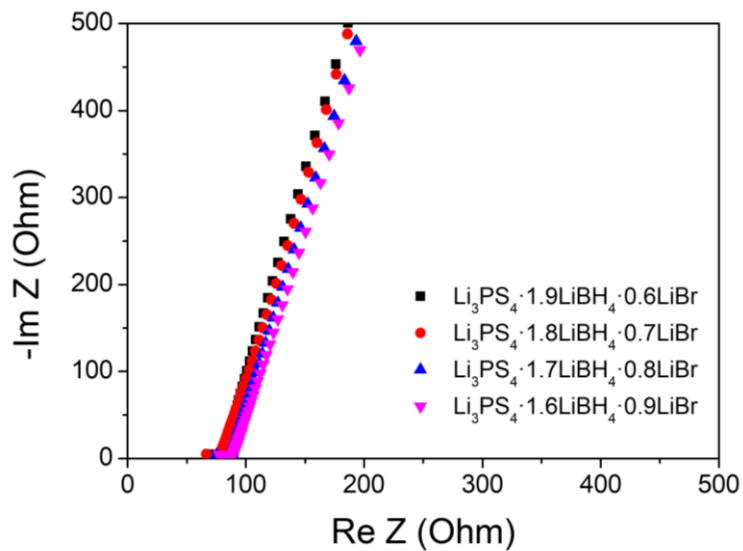

Fig. S5. Nyquist plots of the cells including the prepared solid electrolytes with the composition of  $\text{Li}_3\text{PS}_4 \cdot (2.5-x)\text{LiBH}_4 \cdot x\text{LiBr}$  ( $x = 0.6, 0.7, 0.8,$  and  $0.9$ ).

Table S2. Ionic conductivities of the prepared solid electrolyte samples.

| $x$ | Composition                                                          | Ionic conductivity<br>( $\text{mS cm}^{-1}$ at $25^\circ\text{C}$ ) |
|-----|----------------------------------------------------------------------|---------------------------------------------------------------------|
| 0.6 | $\text{Li}_3\text{PS}_4 \cdot 1.9\text{LiBH}_4 \cdot 0.6\text{LiBr}$ | 13.7                                                                |
| 0.7 | $\text{Li}_3\text{PS}_4 \cdot 1.8\text{LiBH}_4 \cdot 0.7\text{LiBr}$ | 14.4                                                                |
| 0.8 | $\text{Li}_3\text{PS}_4 \cdot 1.7\text{LiBH}_4 \cdot 0.8\text{LiBr}$ | 12.9                                                                |
| 0.9 | $\text{Li}_3\text{PS}_4 \cdot 1.6\text{LiBH}_4 \cdot 0.9\text{LiBr}$ | 10.3                                                                |

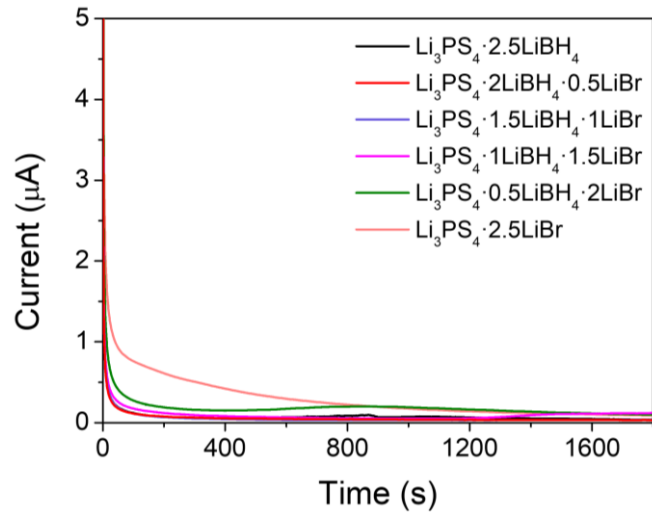

Fig. S6. DC polarization profiles of the prepared solid electrolyte samples with the composition of  $\text{Li}_3\text{PS}_4 \cdot (2.5-x)\text{LiBH}_4 \cdot x\text{LiBr}$ .

The resistance  $R$  is obtained from the measured DC polarization plot, and the conductivity of the samples can be calculated using the equation:

$$\sigma = \frac{t}{RA}$$

where  $t$  is the thickness of the sample and  $A$  is its area.

Table S3. Electronic conductivities of the prepared solid electrolyte samples with the composition of  $\text{Li}_3\text{PS}_4 \cdot (2.5-x)\text{LiBH}_4 \cdot x\text{LiBr}$ .

| $x$ | Composition                                                        | Electronic conductivity<br>( $\text{mS cm}^{-1}$ at $25^\circ\text{C}$ ) |
|-----|--------------------------------------------------------------------|--------------------------------------------------------------------------|
| 0   | $\text{Li}_3\text{PS}_4 \cdot 2.5 \text{ LiBH}_4$                  | $8.8 \times 10^{-5}$                                                     |
| 0.5 | $\text{Li}_3\text{PS}_4 \cdot 2\text{LiBH}_4 \cdot 0.5\text{LiBr}$ | $9.2 \times 10^{-5}$                                                     |
| 1   | $\text{Li}_3\text{PS}_4 \cdot 1.5\text{LiBH}_4 \cdot 1\text{LiBr}$ | $7.4 \times 10^{-5}$                                                     |
| 1.5 | $\text{Li}_3\text{PS}_4 \cdot 1\text{LiBH}_4 \cdot 1.5\text{LiBr}$ | $3.7 \times 10^{-5}$                                                     |
| 2   | $\text{Li}_3\text{PS}_4 \cdot 0.5\text{LiBH}_4 \cdot 2\text{LiBr}$ | $3.1 \times 10^{-5}$                                                     |
| 2.5 | $\text{Li}_3\text{PS}_4 \cdot 2.5\text{LiBr}$                      | $1.5 \times 10^{-5}$                                                     |



Table S4. Activation energy of the prepared solid electrolyte samples with the composition of  $\text{Li}_3\text{PS}_4 \cdot (2.5-x)\text{LiBH}_4 \cdot x\text{LiBr}$ . The activation energy errors across several trials are within  $\pm 0.5$   $\text{kJ mol}^{-1}$ .

| $x$ | Composition                                                        | Activation energy ( $\text{kJ mol}^{-1}$ ) |
|-----|--------------------------------------------------------------------|--------------------------------------------|
| 0.5 | $\text{Li}_3\text{PS}_4 \cdot 2\text{LiBH}_4 \cdot 0.5\text{LiBr}$ | 28.8                                       |
| 1   | $\text{Li}_3\text{PS}_4 \cdot 1.5\text{LiBH}_4 \cdot 1\text{LiBr}$ | 29.6                                       |
| 1.5 | $\text{Li}_3\text{PS}_4 \cdot 1\text{LiBH}_4 \cdot 1.5\text{LiBr}$ | 29.8                                       |
| 2   | $\text{Li}_3\text{PS}_4 \cdot 0.5\text{LiBH}_4 \cdot 2\text{LiBr}$ | 32.8                                       |
| 2.5 | $\text{Li}_3\text{PS}_4 \cdot 2.5\text{LiBr}$                      | 29.2                                       |

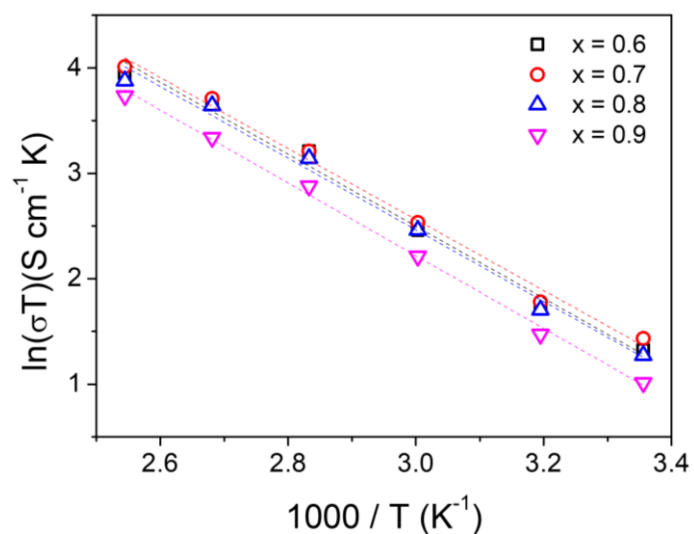

Fig. S7. Temperature dependence of ionic conductivities shown by the prepared solid electrolyte samples with the composition of  $\text{Li}_3\text{PS}_4 \cdot (2.5-x)\text{LiBH}_4 \cdot x\text{LiBr}$ .

Table S5. Activation energy of the prepared solid electrolyte samples with the composition of  $\text{Li}_3\text{PS}_4 \cdot (2.5-x)\text{LiBH}_4 \cdot x\text{LiBr}$ .

| $x$ | Composition                                                          | Activation energy ( $\text{kJ mol}^{-1}$ ) |
|-----|----------------------------------------------------------------------|--------------------------------------------|
| 0.6 | $\text{Li}_3\text{PS}_4 \cdot 1.9\text{LiBH}_4 \cdot 0.6\text{LiBr}$ | 28.3                                       |
| 0.7 | $\text{Li}_3\text{PS}_4 \cdot 1.8\text{LiBH}_4 \cdot 0.7\text{LiBr}$ | 27.9                                       |
| 0.8 | $\text{Li}_3\text{PS}_4 \cdot 1.7\text{LiBH}_4 \cdot 0.8\text{LiBr}$ | 28.3                                       |
| 0.9 | $\text{Li}_3\text{PS}_4 \cdot 1.6\text{LiBH}_4 \cdot 0.9\text{LiBr}$ | 28.9                                       |

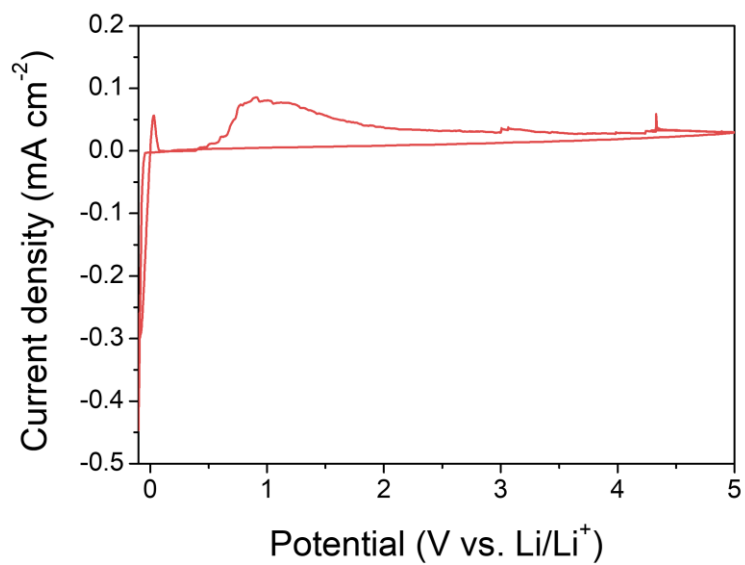

Fig. S8. CV curves of the Li/solid electrolyte/solid electrolyte-conductive carbon/SS cell measured at a scan rate of 1 mV cm<sup>-1</sup>.

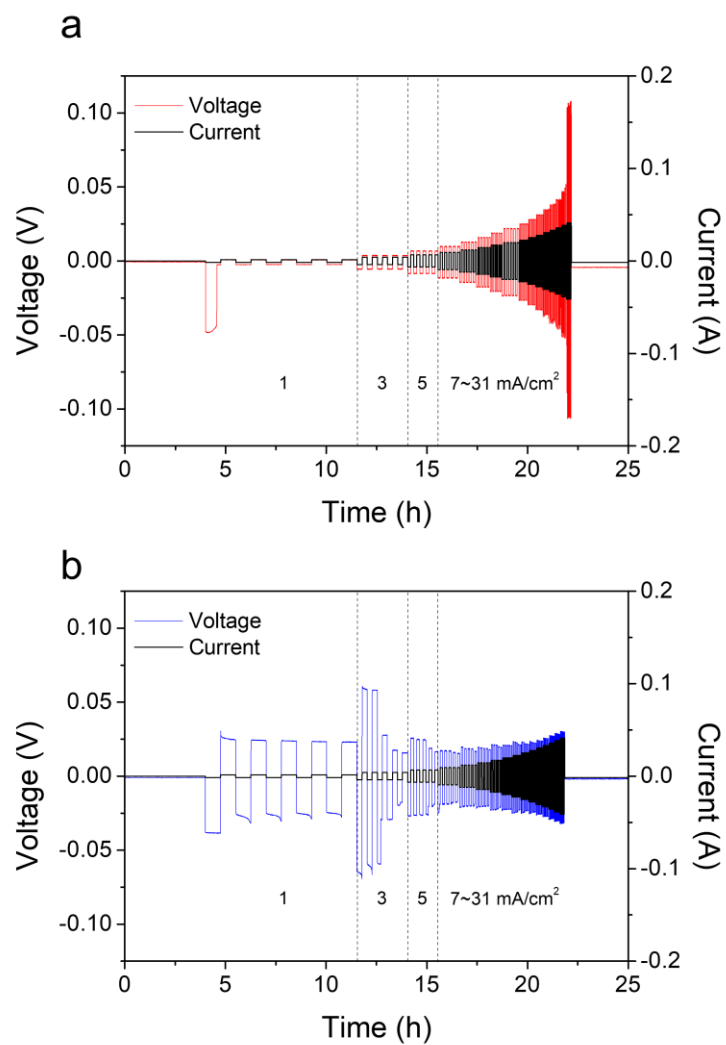

Fig. S9. Voltage profiles of the Li metal symmetric cells including the prepared solid electrolytes: (a)  $\text{Li}_3\text{PS}_4 \cdot 2.5\text{LiBH}_4$  and (b)  $\text{Li}_3\text{PS}_4 \cdot 2\text{LiBH}_4 \cdot 0.5\text{LiBr}$ .

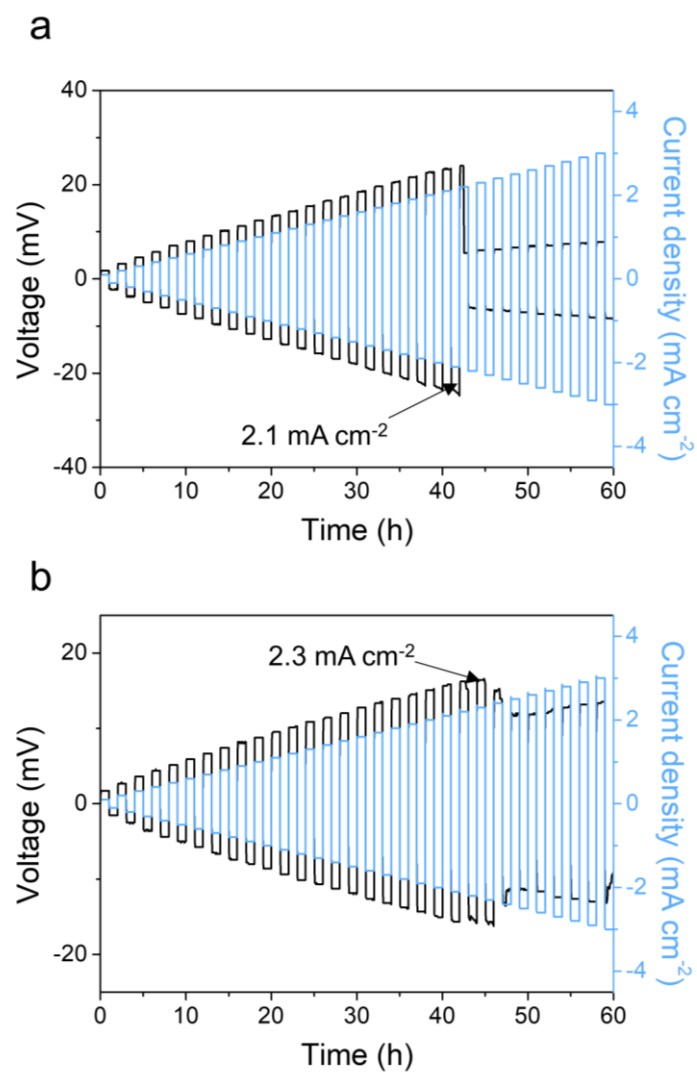

Fig. S10. Critical current density profiles using the time-constant mode: (a)  $\text{Li}_3\text{PS}_4 \cdot 2.5\text{LiBH}_4$  and (b)  $\text{Li}_3\text{PS}_4 \cdot 2\text{LiBH}_4 \cdot 0.5\text{LiBr}$ .
